# Supplementary material for: Finite-sample improved confidence intervals based on the estimating equation theory for the modified Poisson and least-squares regressions
Source: publisher site journal article supplement (doi:10.1515/em-2024-0030), 2025-01-01
Supplement: Supplementary file 1 [file j_em-2024-0030_suppl_001.pdf]

SUPPLEMENTARY MATERIALS for

**Finite-sample improved confidence intervals based on the estimating  
equation theory for the modified Poisson and least-squares regressions**

Hisashi Noma<sup>1,2</sup> and Masahiko Gosho<sup>3</sup>

<sup>1</sup> *Department of Interdisciplinary Statistical Mathematics, The Institute of Statistical Mathematics,  
Tokyo, Japan*

<sup>2</sup> *The Graduate Institute for Advanced Studies, The Graduate University for Advanced Studies,  
Tokyo, Japan*

<sup>3</sup> *Department of Biostatistics, Institute of Medicine, University of Tsukuba, Tsukuba, Japan*

**e-Appendix A: Supplementary data for the simulation studies**

In e-Figures 1 and 2, the frequencies of the occurrences of separation or quasi-separation are presented. In small sample settings, these events could occur at certain frequencies (at most 10%-15%). The simulation results presented in the main manuscript eliminated these irregular cases.

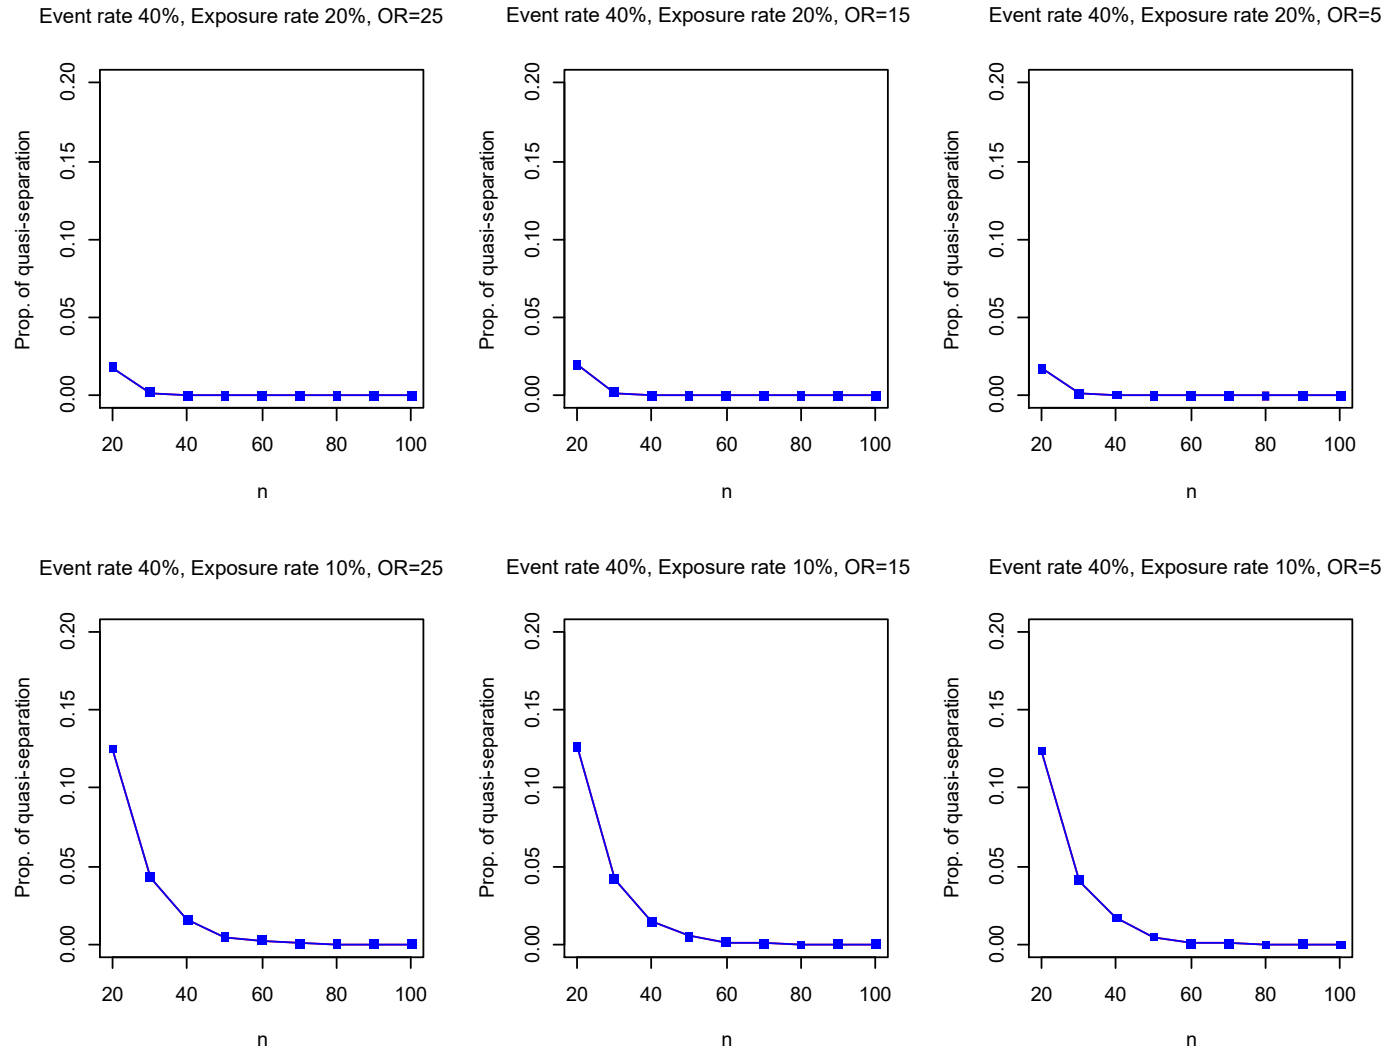

**e-Figure 1.** Frequencies of the occurrences of separation or quasi-separation in simulation studies (**red**: modified Poisson regression; **blue**: modified least-squares regression).

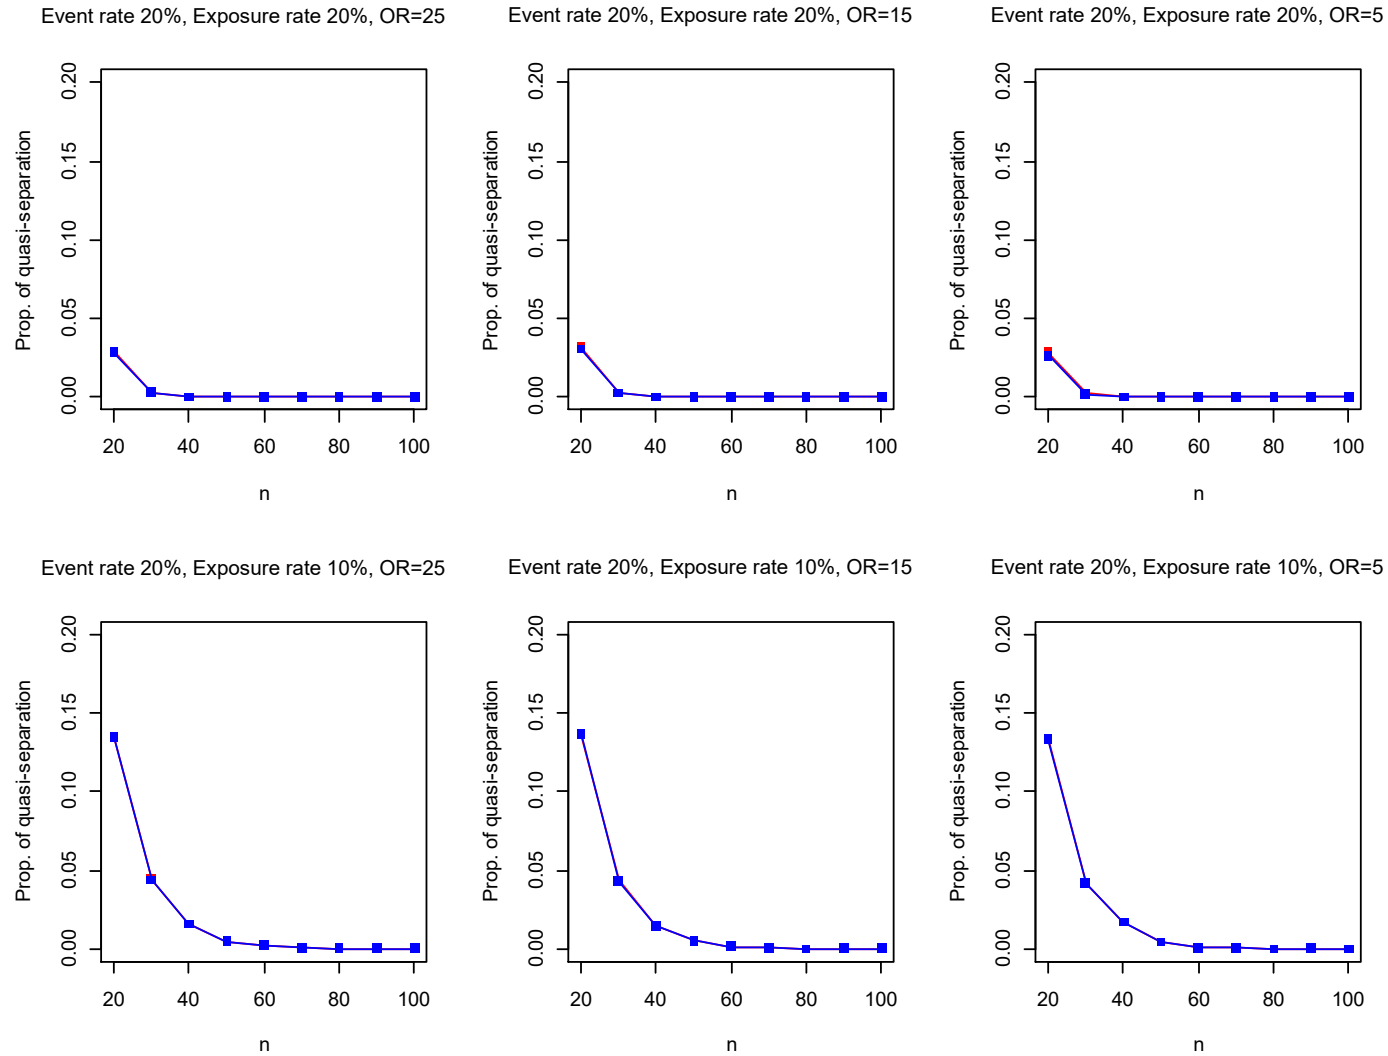

**e-Figure 2.** Frequencies of the occurrences of separation or quasi-separation in simulation studies (**red**: modified Poisson regression; **blue**: modified least-squares regression).

### **e-Appendix B: Supplementary data for the epilepsy clinical study**

As supplementary data, we provide summary statistics of the epilepsy clinical study data in e-Table 1.

**e-Table 1.** Summary of epilepsy epidemiological study.

|                                                                   | Overall      | Employed     | Not employed |
|-------------------------------------------------------------------|--------------|--------------|--------------|
| N                                                                 | 56           | 14           | 42           |
| Age at follow-up (mean, SD)                                       | 30.00 (8.52) | 35.14 (8.87) | 28.29 (7.78) |
| Gender (male vs. female)                                          | 23 (41.1%)   | 8 (57.1%)    | 15 (35.7%)   |
| Mood disorder symptoms (yes vs. no)                               | 5 (8.9%)     | 5 (35.7%)    | 0 (0.0%)     |
| Graduating from a school for special needs education (yes vs. no) | 44 (78.6%)   | 5 (35.7%)    | 39 (92.9%)   |
